# Supplementary material for: Host transcriptional response to TB preventive therapy differentiates two sub-groups of IGRA-positive individuals
Source: PubMed Central journal article supplement (PMC7985621; doi:10.1016/j.tube.2020.102033), 2021-03
Supplement: mmc8.pdf [file mmc8.pdf]

**A**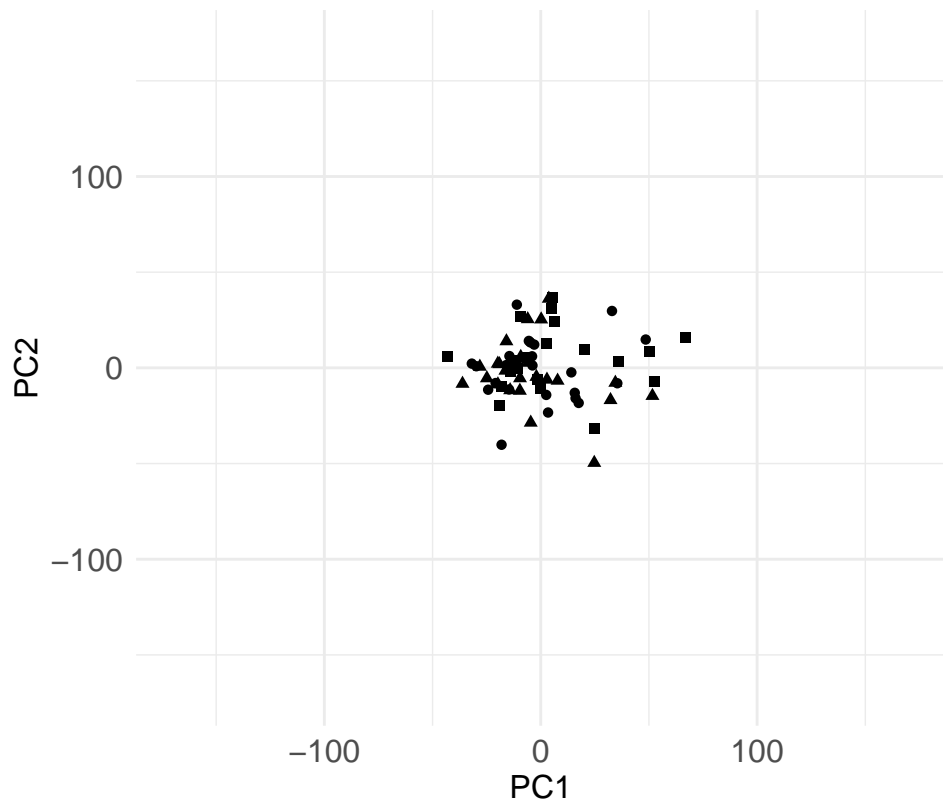**B**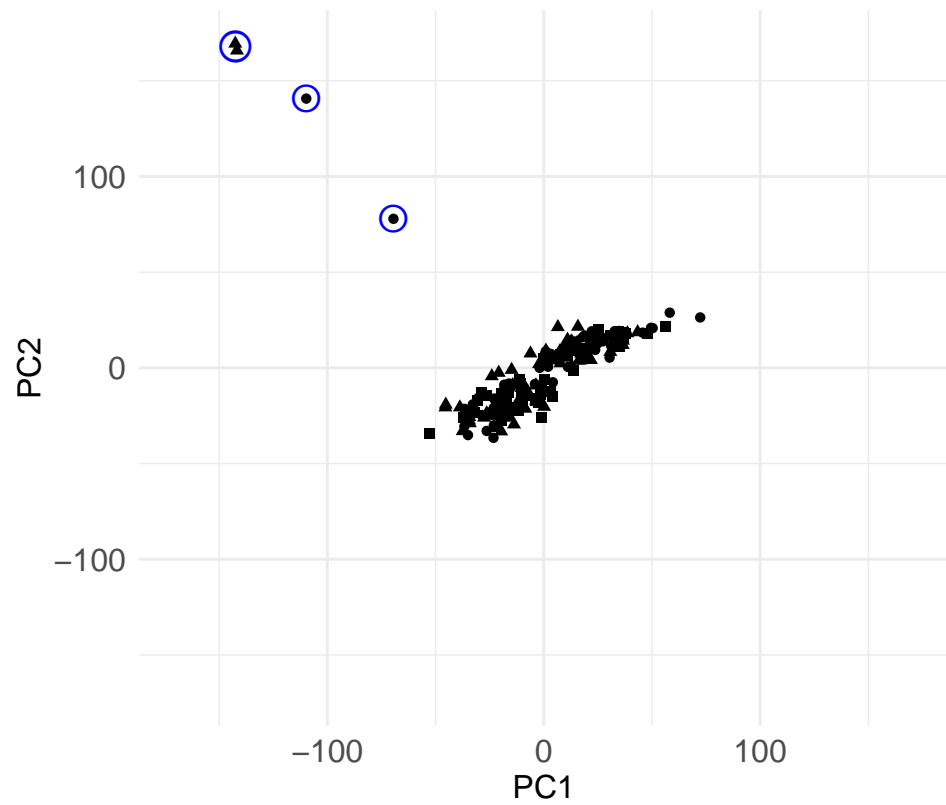

Visit • V1 ▲ V2 ■ V3
