# Supplementary material for: Host transcriptional response to TB preventive therapy differentiates two sub-groups of IGRA-positive individuals
Source: PubMed Central journal article supplement (PMC7985621; doi:10.1016/j.tube.2020.102033), 2021-03
Supplement: mmc9.pdf [file mmc9.pdf]

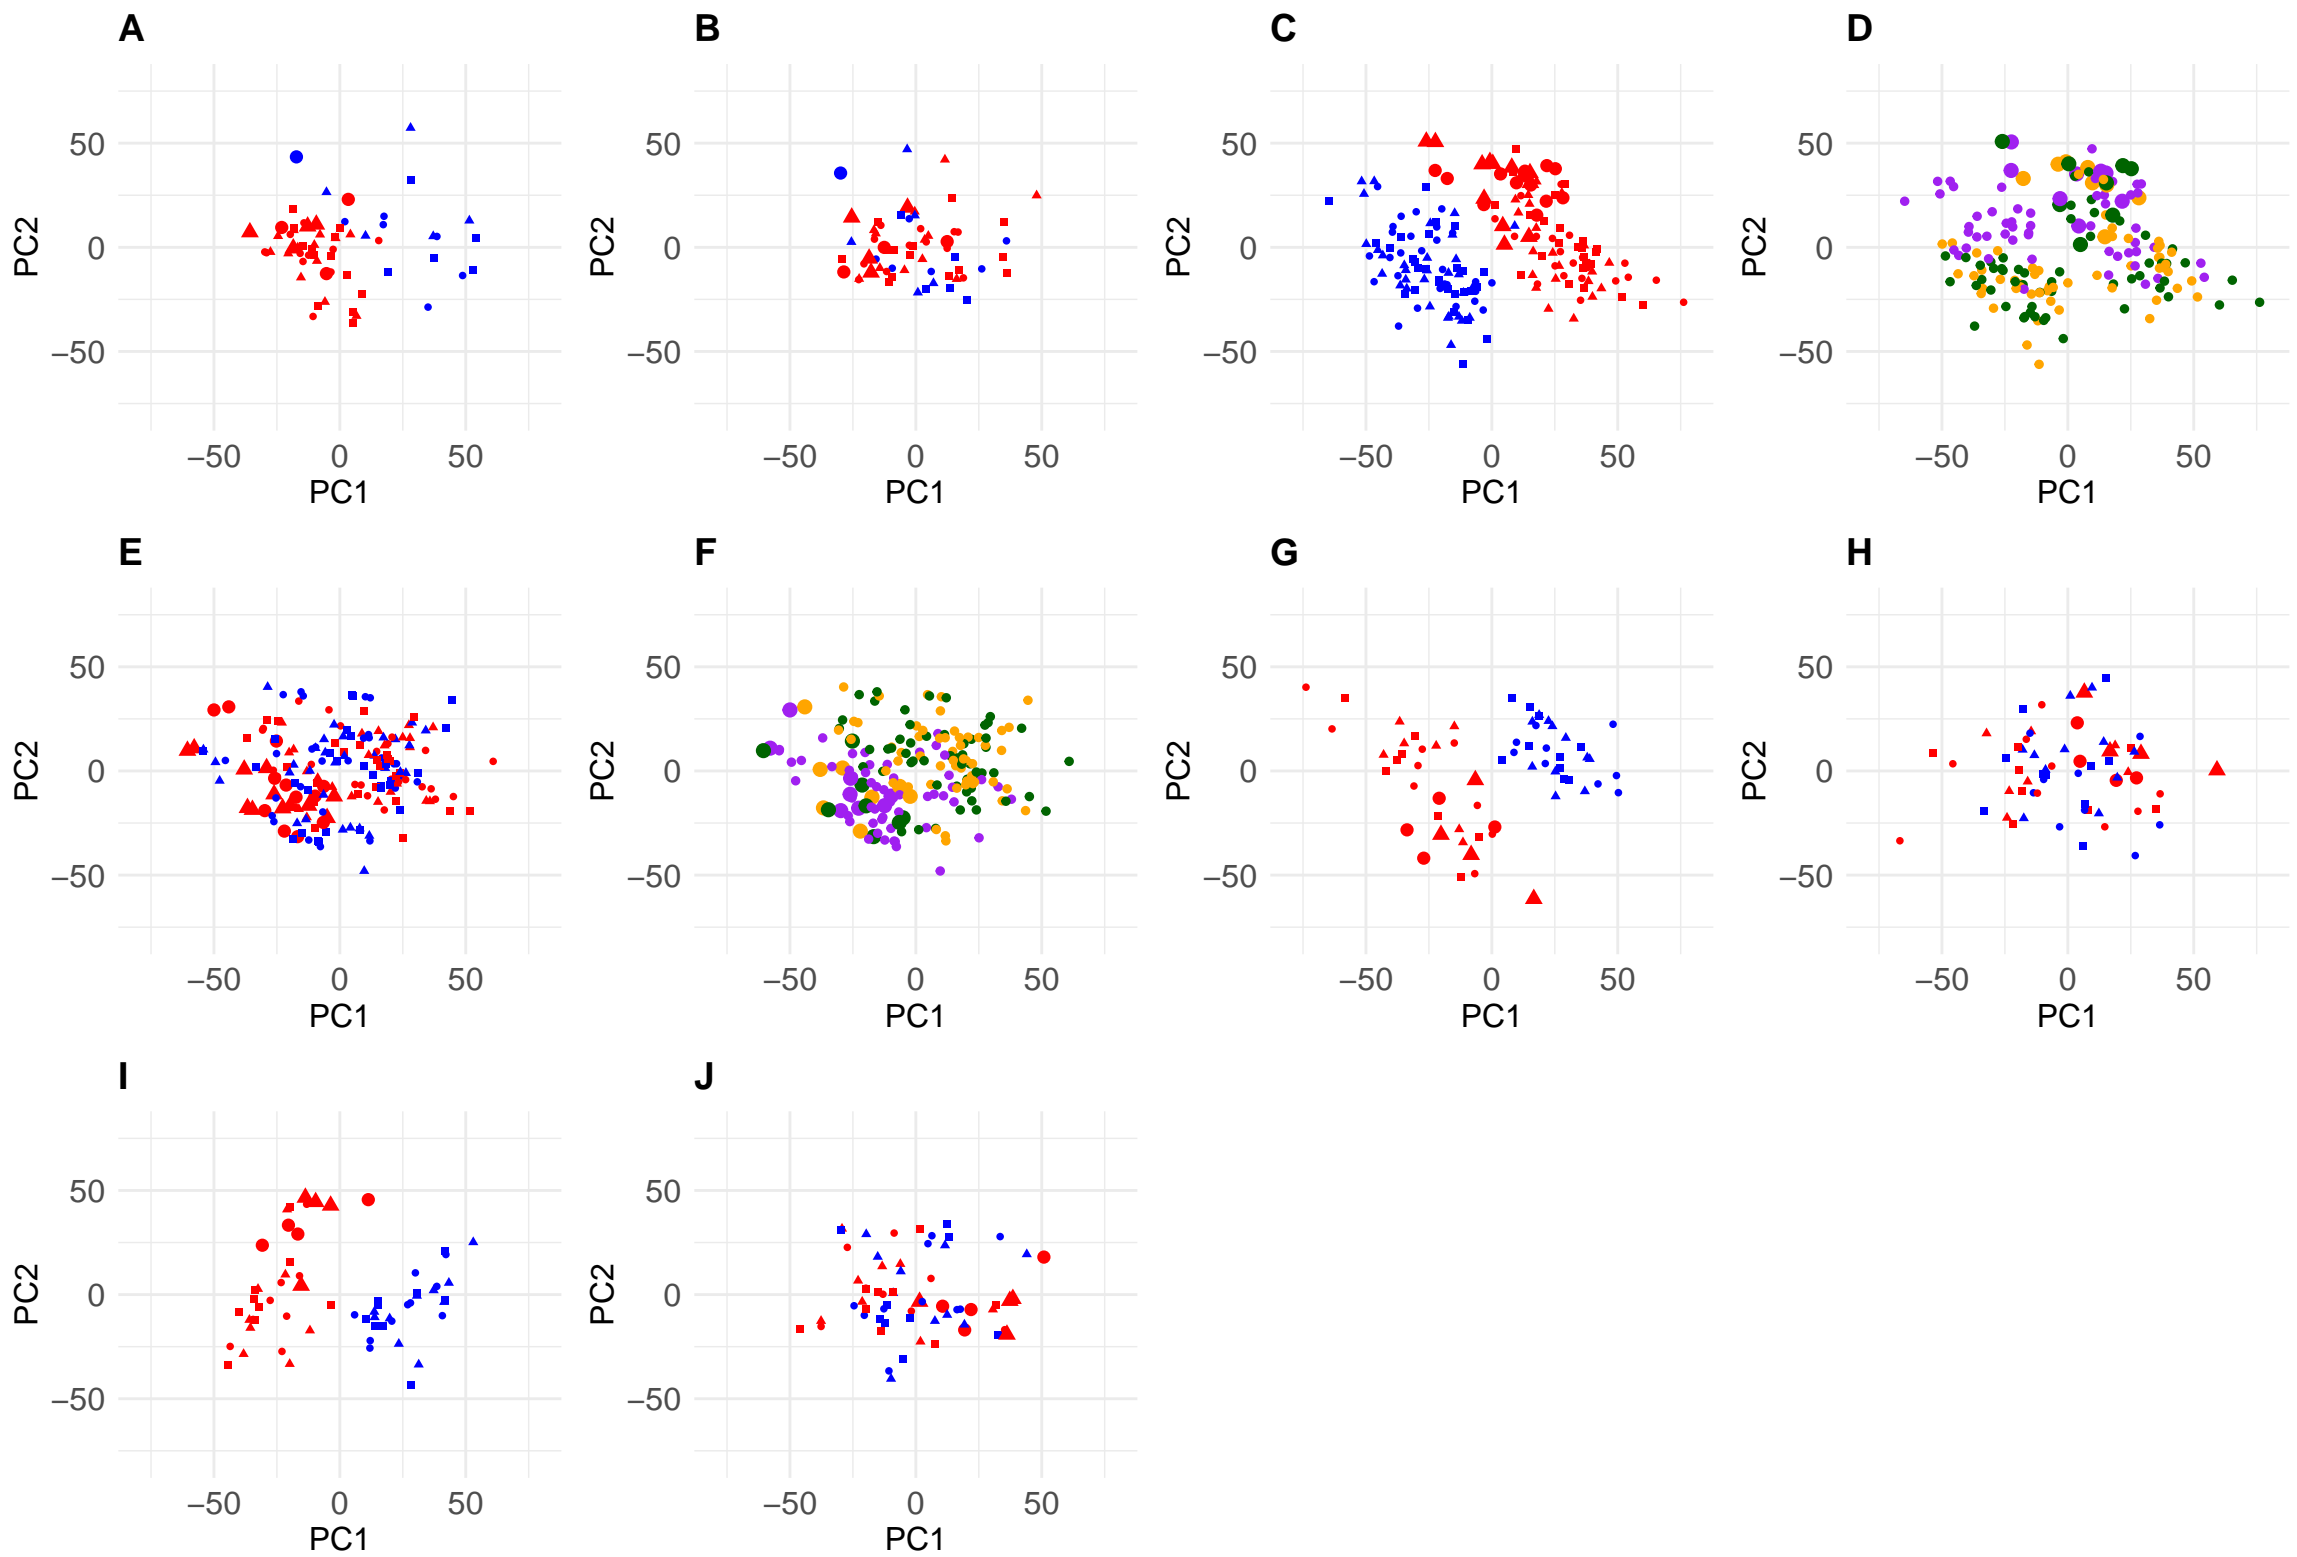

Visit ● V1 ▲ V2 ■ V3

Batch ● A ● B

Condition ● IGRA- ● IGRA+

Tube ● Neg ● TB1 ● TB2
