# Supplementary material for: Host transcriptional response to TB preventive therapy differentiates two sub-groups of IGRA-positive individuals
Source: PubMed Central journal article supplement (PMC7985621; doi:10.1016/j.tube.2020.102033), 2021-03

**A**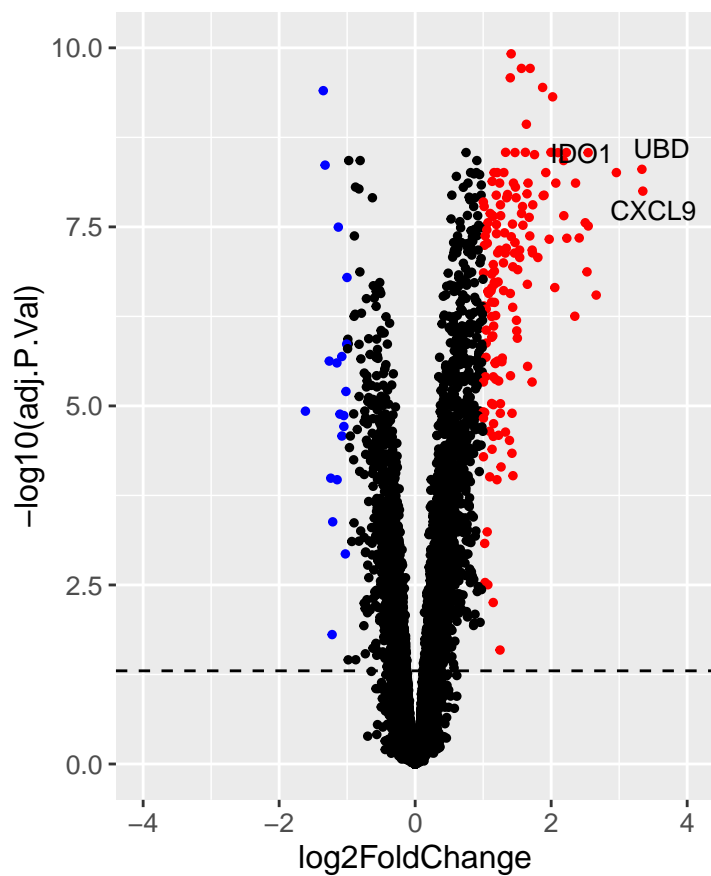**B**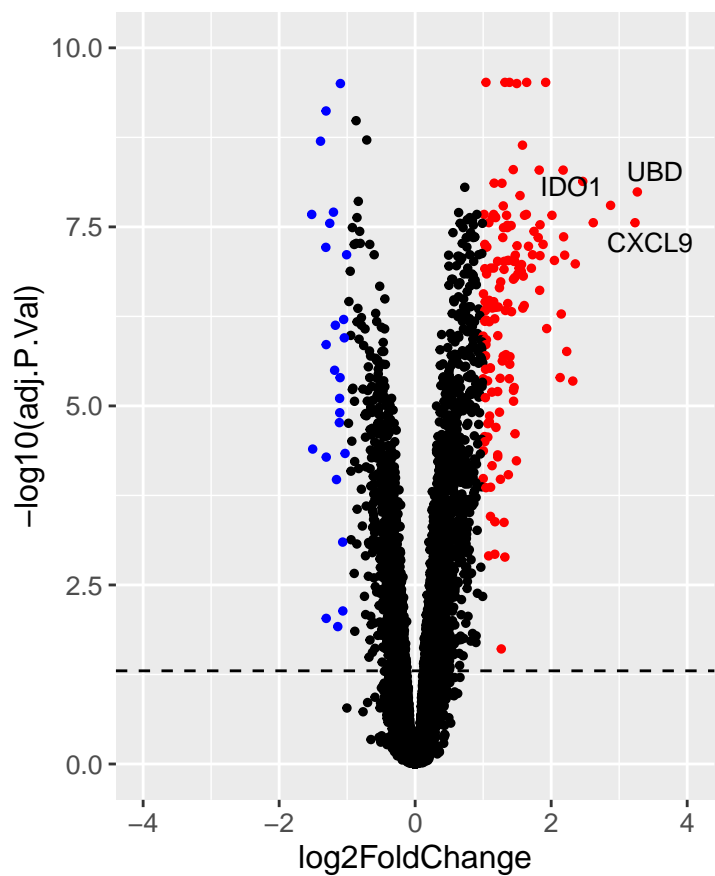**C**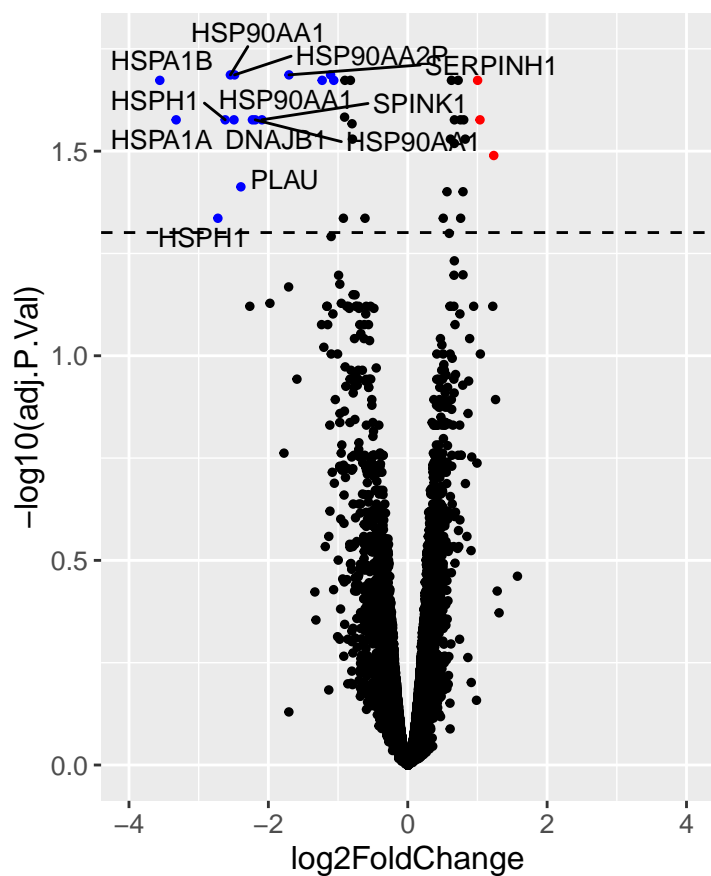**D**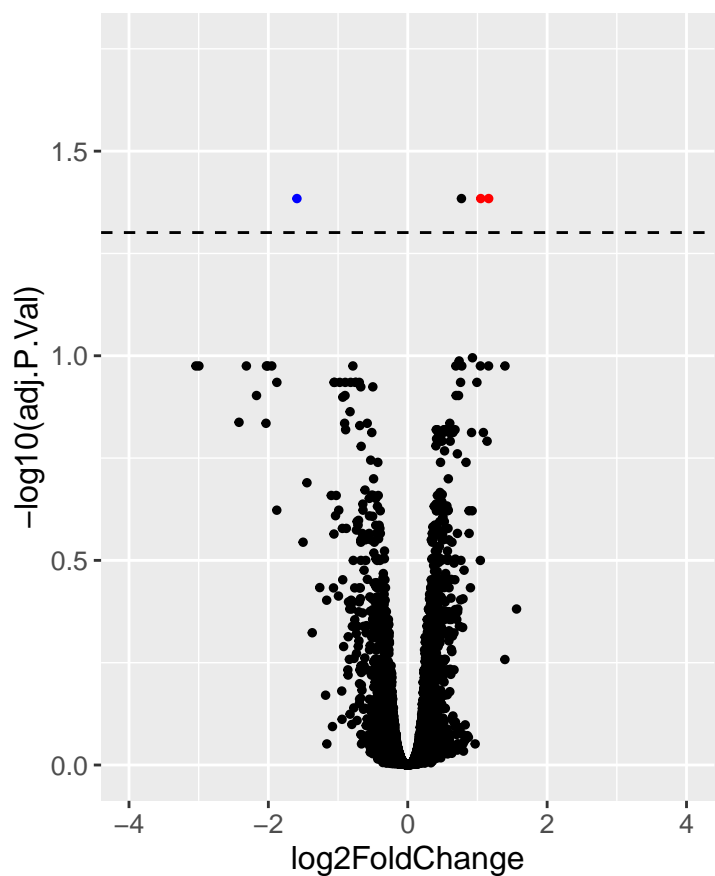

Supplement: mmc10.pdf [file mmc10.pdf]
