# Supplementary material for: Host transcriptional response to TB preventive therapy differentiates two sub-groups of IGRA-positive individuals
Source: PubMed Central journal article supplement (PMC7985621; doi:10.1016/j.tube.2020.102033), 2021-03

**A. Subgroup A**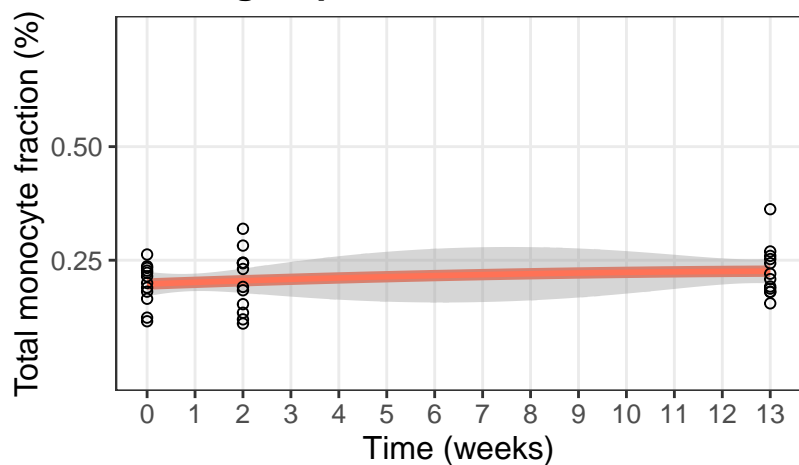**B. Subgroup A**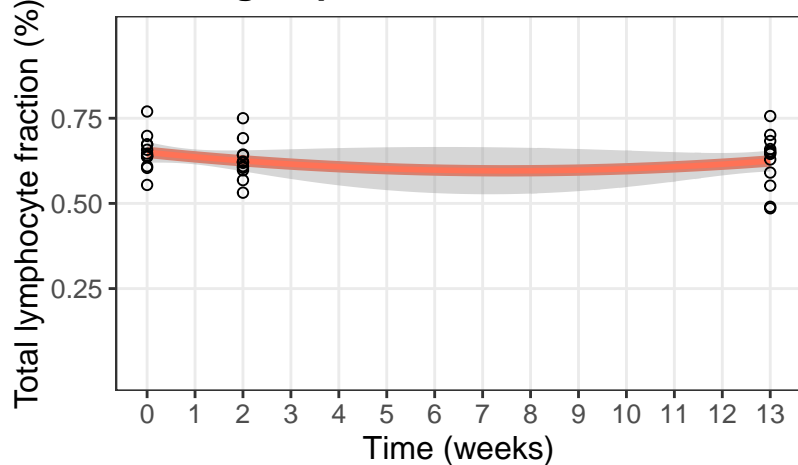**Subgroup B**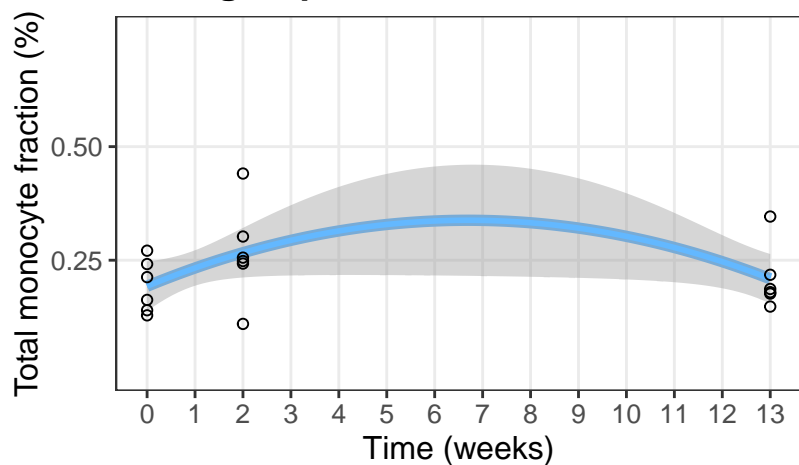**Subgroup B**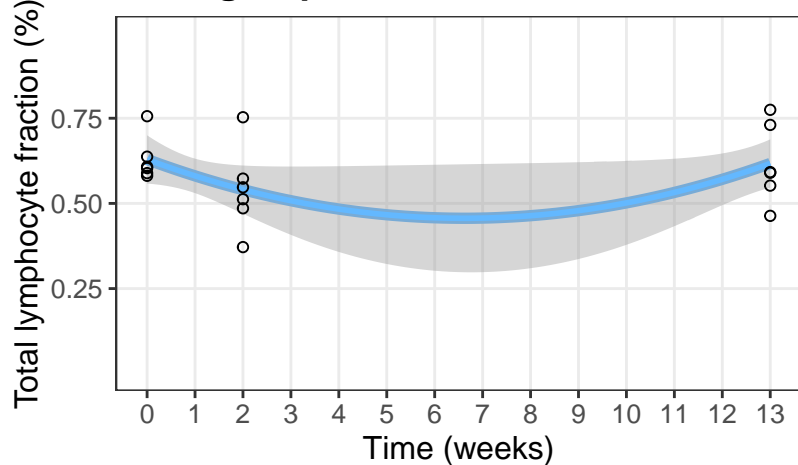**C. Subgroup A**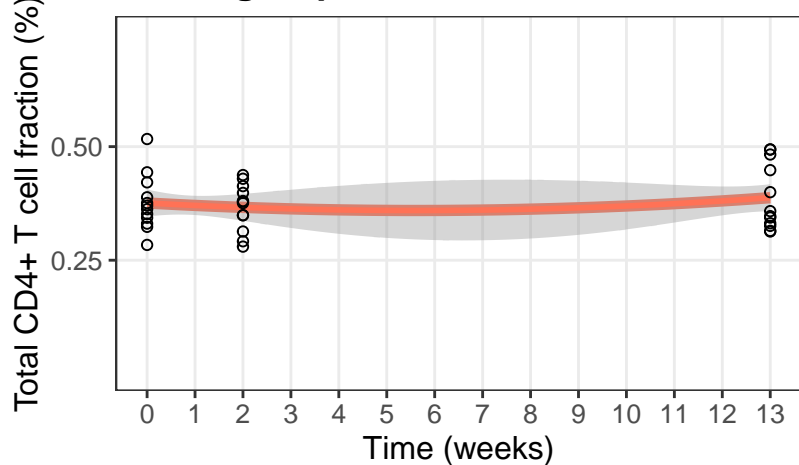**D. Subgroup A**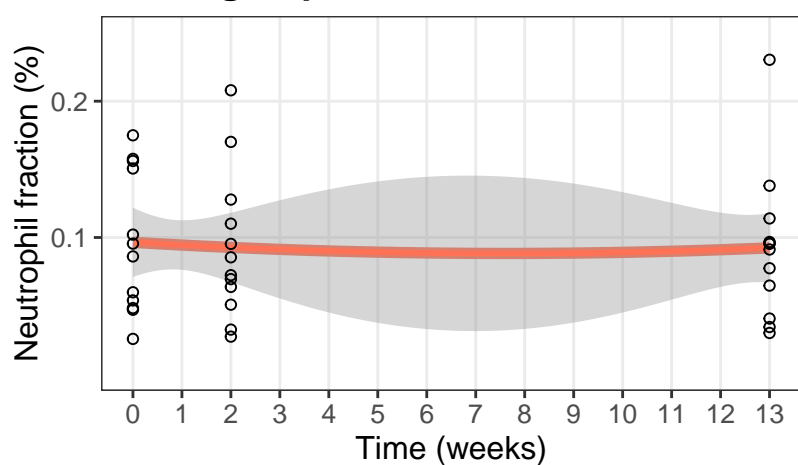**Subgroup B**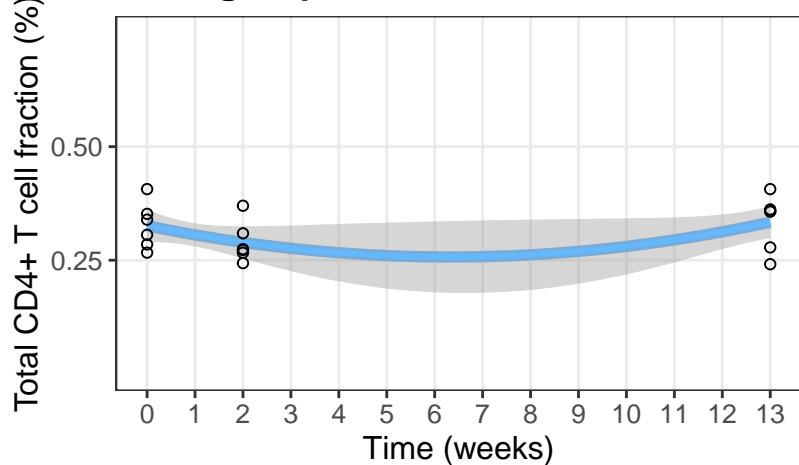**Subgroup B**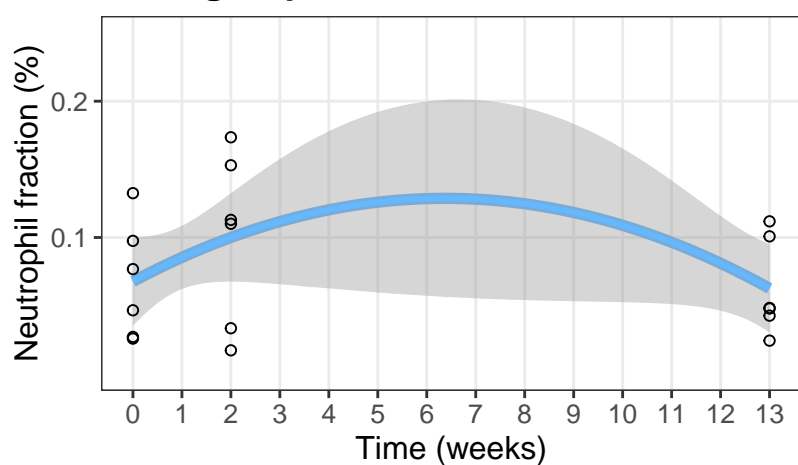

Supplement: mmc11.pdf [file mmc11.pdf]
